# Supplementary material
Source: publisher figshare collection journal article supplement (https://acs.figshare.com/ndownloader/files/29373913)
Supplement: Supplementary file 1 [file 29373913]

## Supporting Information

### **Ferroelectricity and Ferromagnetism Achieved via Adjusting Dimensionality in BiFeO<sub>3</sub>/BiMnO<sub>3</sub> Superlattices**

Cai Jin,<sup>1,2</sup>, Xiaowen Li,<sup>1</sup> Wenqiao Han,<sup>1</sup> Qi Liu,<sup>1</sup> Sixia Hu,<sup>3</sup> Yanjiang Ji,<sup>1</sup> Zedong Xu,<sup>1</sup> Songbai Hu,<sup>1</sup> Mao Ye,<sup>1</sup> Meng Gu,<sup>4</sup> Yuanmin Zhu,<sup>\*, 4, 5</sup> and Lang Chen<sup>\*, 1, 3</sup>

<sup>1</sup>Department of Physics, Southern University of Science and Technology, Shenzhen 518055, China.

<sup>2</sup>School of Physics, Harbin Institute of Technology, Harbin 150081, China.

<sup>3</sup>Materials Characterization and Preparation Center, Southern University of Science and Technology, Shenzhen 518055, China.

<sup>4</sup>Department of Materials Science and Engineering, Southern University of Science and Technology, Shenzhen 518055, China.

<sup>5</sup>School of Materials Science and Engineering, Dongguan University of Technology, Dongguan 523808, China.

\*Corresponding Authors: zhuym3@sustech.edu.cn; chenlang@sustech.edu.cn

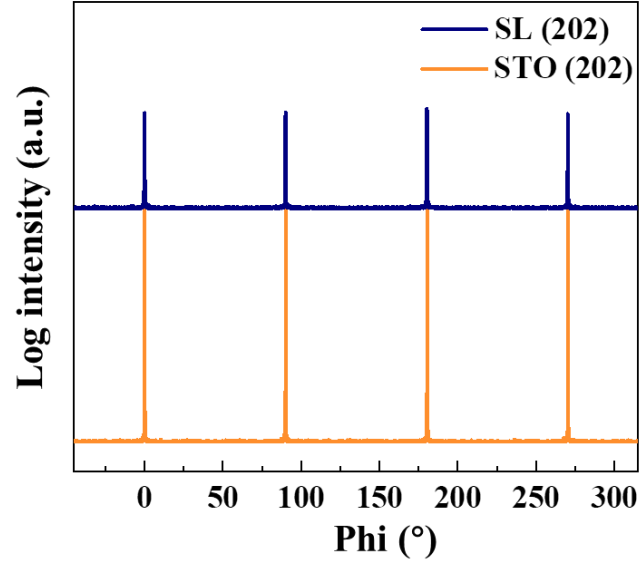

**Figure S1.** The  $\phi$  scans of the  $\text{BFO}_5/\text{BMO}_{10}$  SLs (202) and STO (202) planes, showing good in-plane orientation with a fourfold rotational symmetry.

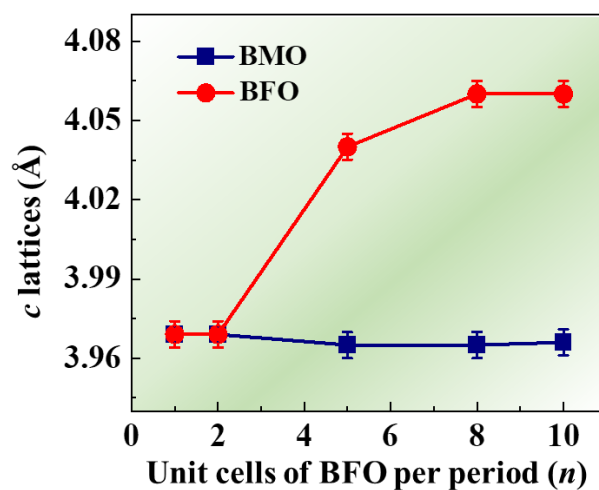

**Figure S2.** The dependence of calculated  $c$  lattices constants of BMO and BFO and  $n$ .

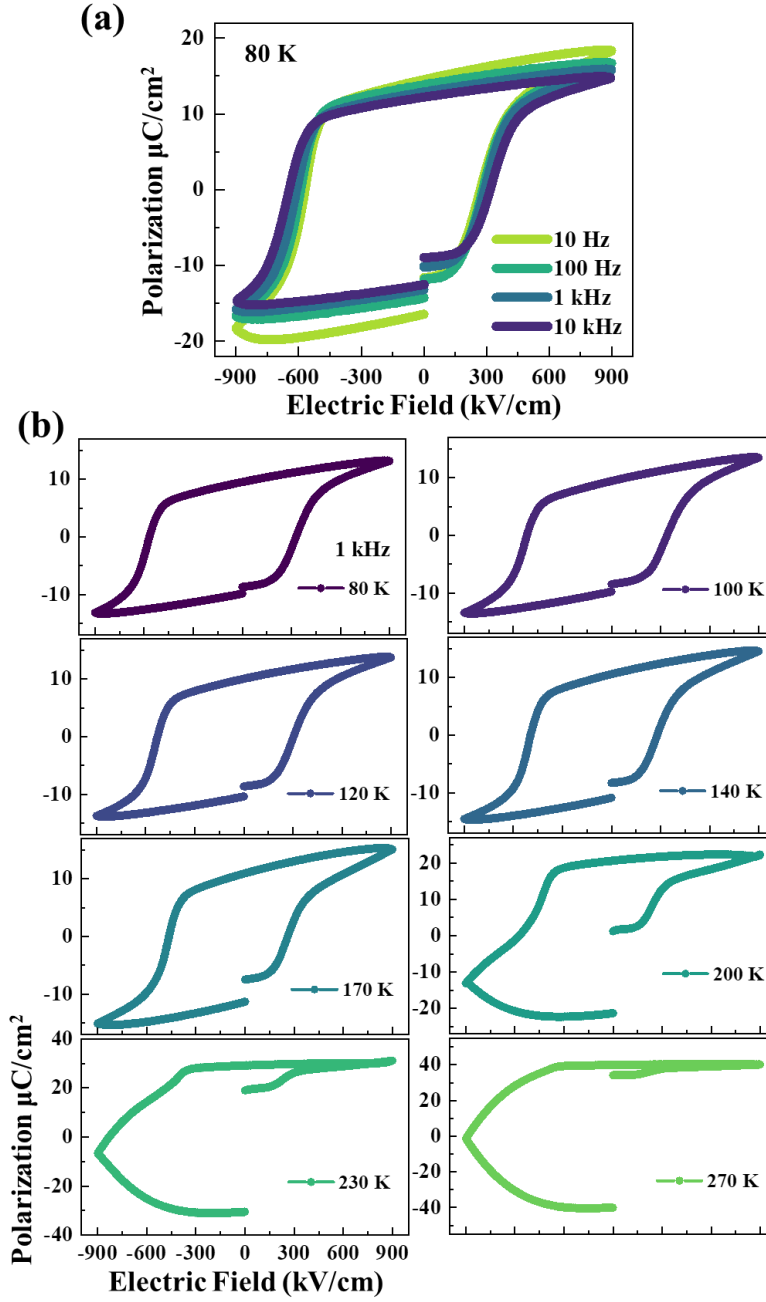

**Figure S3.** (a) Macroscopic electrical  $P$ - $E$  hysteresis loops of  $(\text{BFO}_5/\text{BMO}_{10})_{25}$  SLs measured at 80 K with different frequencies. (b)  $P$ - $E$  hysteresis loops measured with 1 kHz frequency at 80 K, 100 K, 120 K, 140 K, 170 K, 200 K, 230 K and 270 K, respectively.

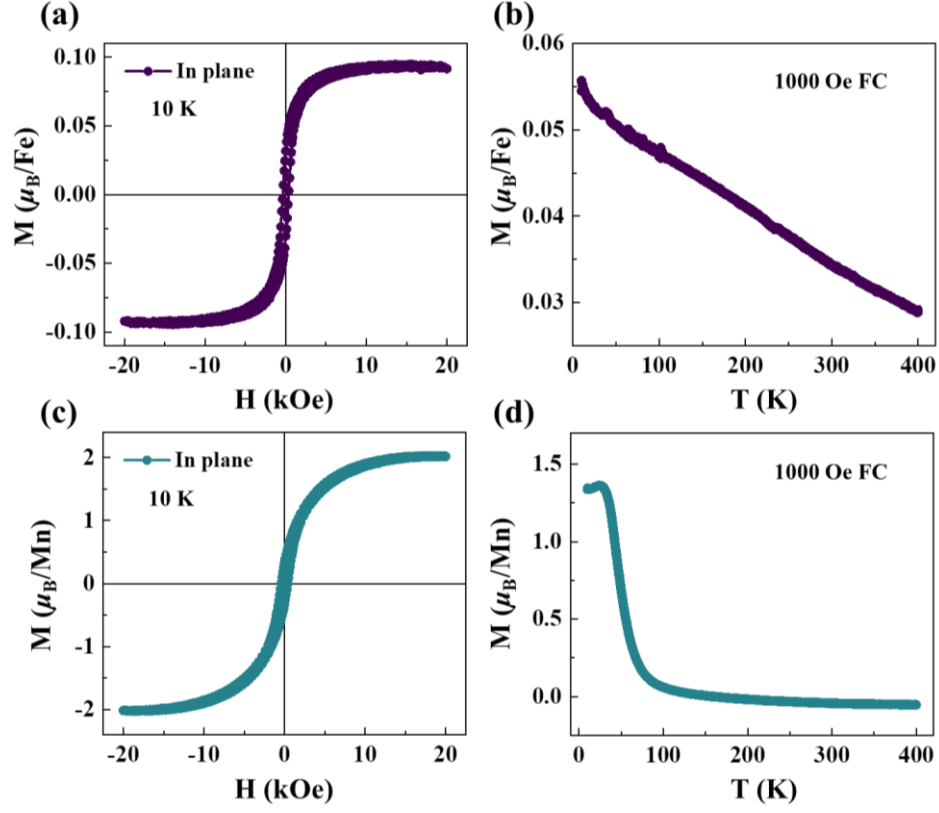

**Figure S4.** (a) In-plane  $M$ - $H$  hysteresis loops, and (b)  $M$ - $T$  curves of single-phase BFO films on STO substrates. (c) In-plane  $M$ - $H$  hysteresis loops, and (d)  $M$ - $T$  curves of single-phase BMO films on STO substrates. The  $M$ - $H$  loops were recorded at 10 K, and the  $M$ - $T$  curves were measured after field-cooling at 1000 Oe.

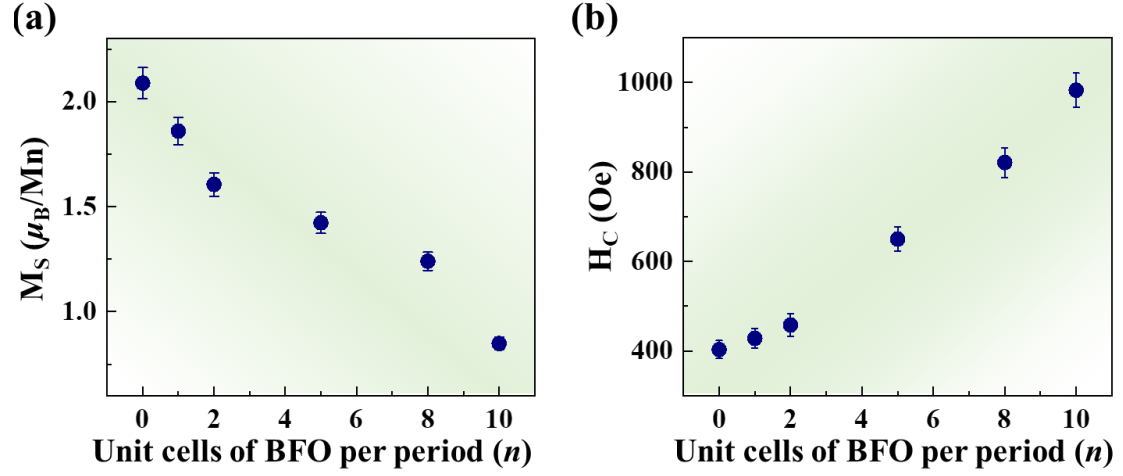

**Figure S5.** (a) The dependence of the saturated magnetization  $M_S$  and the dimensionality of BFO layers per period. (b) The dependence of the coercive field  $H_C$  and the dimensionality of BFO layers per period.

**Table S1.** The calculated results of two magnetic coupling models of BFO/BMO SLs.

|                                      | FM model | AFM model |
|--------------------------------------|----------|-----------|
| $M$ ( $\mu_B/\text{Mn}$ )            | 3.41     | 0.17      |
| Energy ( $\text{meV}/\text{\AA}^3$ ) | -2143    | -2146     |

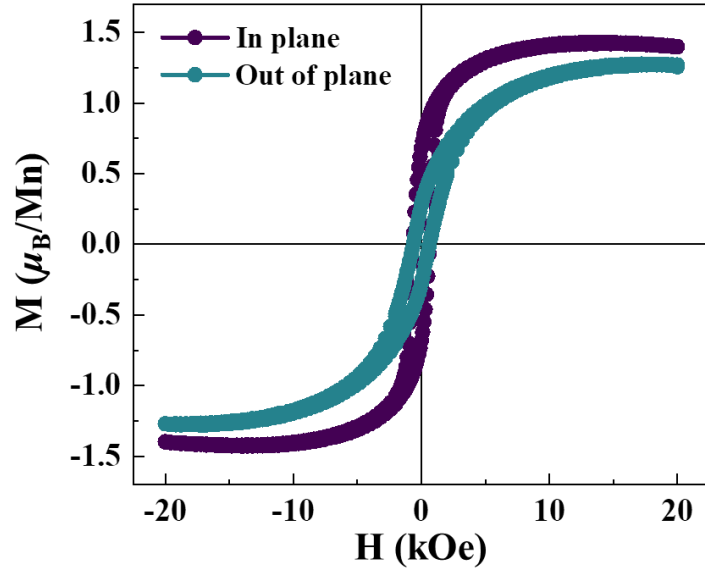

**Figure S6.** In-plane and out-of-plane  $M$ - $H$  hysteresis loops of BFO<sub>5</sub>/BMO<sub>10</sub> SLs measured at 10 K.

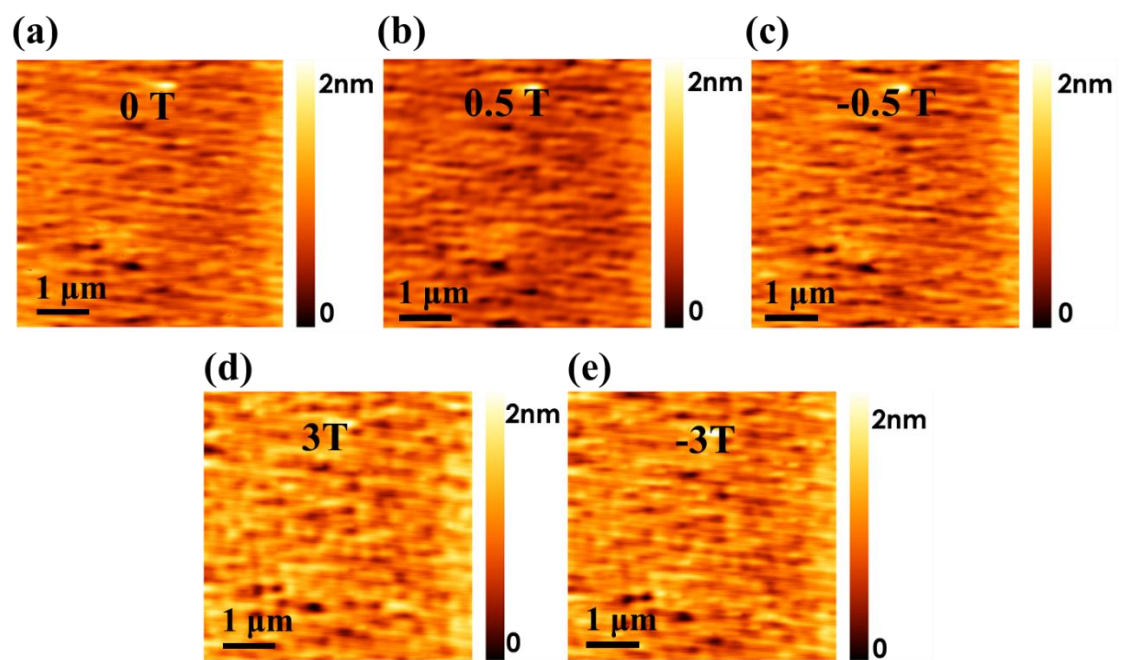

**Figure S7.** Topography of BFO<sub>5</sub>/BMO<sub>10</sub> SLs under the external magnetic fields of (a) 0 T, (b) 0.5 T, (c) -0.5 T, (d) 3 T, and (e) -3 T.
